# Supplementary material for: Down-Regulating the High Level of 17-Beta-Hydroxysteroid Dehydrogenase 13 Plays a Therapeutic Role for Non-Alcoholic Fatty Liver Disease
Source: MDPI journal article supplement (doi:10.3390/ijms23105544), 2022-05-16
Supplement: s1 [file s1]

# Down-Regulating the High Level of 17-Beta-Hydroxysteroid Dehydrogenase 13 Plays a Therapeutic Role for Non-Alcoholic Fatty Liver Disease

Meixi Wang <sup>1</sup>, Jianrui Li <sup>1,2</sup>, Hu Li <sup>1,3</sup>, Biao Dong <sup>1,3</sup>, Jing Jiang <sup>1</sup>, Nannan Liu <sup>1</sup>, Jiali Tan <sup>1</sup>,  
Xuekai Wang <sup>1</sup>, Lei Lei <sup>1</sup>, Hongying Li <sup>1</sup>, Han Sun <sup>1</sup>, Mei Tang <sup>1</sup>, Huiqiang Wang <sup>1</sup>, Haiyan Yan <sup>1,2</sup>,  
Yuhuan Li <sup>1,2,3</sup>, Jiandong Jiang <sup>1,2,3</sup> and Zonggen Peng <sup>1,2,3,\*</sup>

- <sup>1</sup> CAMS Key Laboratory of Antiviral Drug Research, Institute of Medicinal Biotechnology, Chinese Academy of Medical Sciences & Peking Union Medical College, Beijing 100050, China
- <sup>2</sup> Beijing Key Laboratory of Antimicrobial Agents, Institute of Medicinal Biotechnology, Chinese Academy of Medical Sciences & Peking Union Medical College, Beijing 100050, China
- <sup>3</sup> Key Laboratory of Biotechnology of Antibiotics, The National Health and Family Planning Commission (NHFP), Institute of Medicinal Biotechnology, Chinese Academy of Medical Sciences & Peking Union Medical College, Beijing 100050, China

## SUPPLEMENTARY FIGURES

### Supplementary Figure S1

**A**

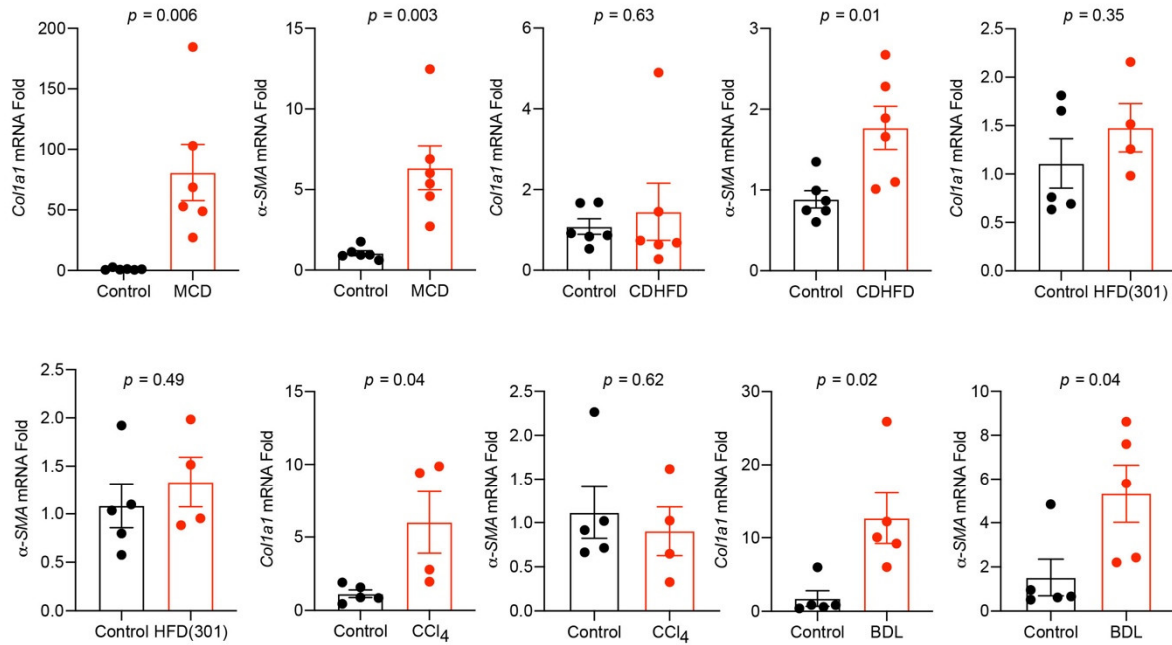

**B**

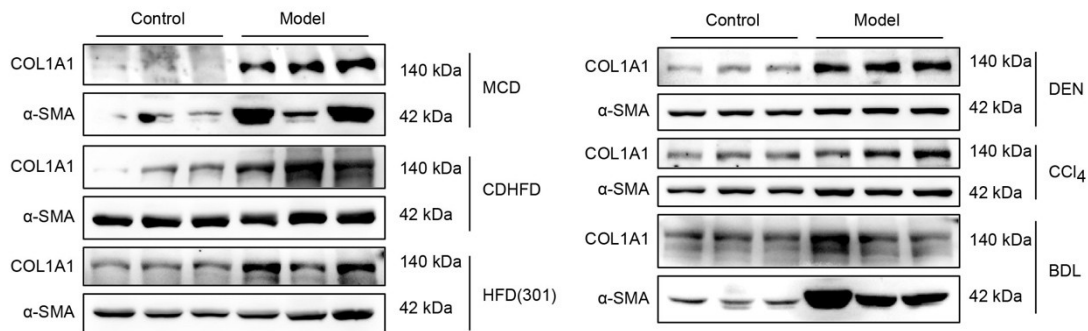

**Supplementary Figure S1.** Fibrosis-related factors are highly expressed in the livers of murine with NAFLD. mRNA (A) and protein (B) levels in the livers of murine models with NAFLD were measured by qRT-PCR and Western blotting, respectively. The equal loading control (ACTB) of protein was shown in **Figure 1E**. Results are expressed as mean  $\pm$  SEM. CCl<sub>4</sub>, carbon tetrachloride; MCD, methionine choline deficient diet; CDHFD, choline deficient and high-fat diet; HFD, high-fat diet; DEN, diethylnitrosamine; BDL, bile-duct ligation; Col1a1, collagen type I alpha 1 chain; α-SMA, alpha-smooth muscle actin.

## Supplementary Figure S2

**A**

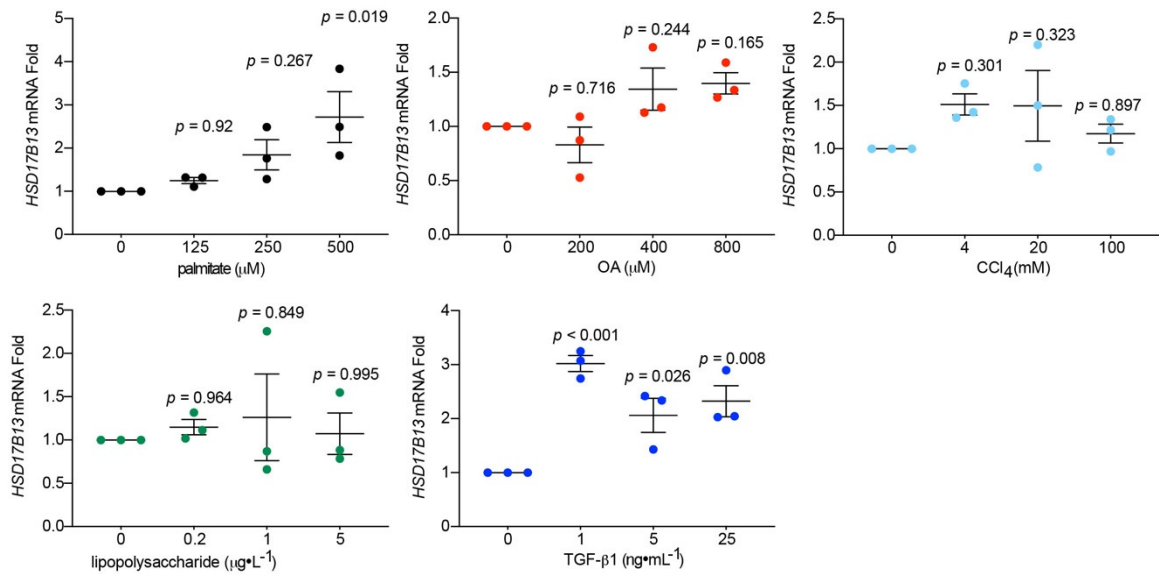

**B**

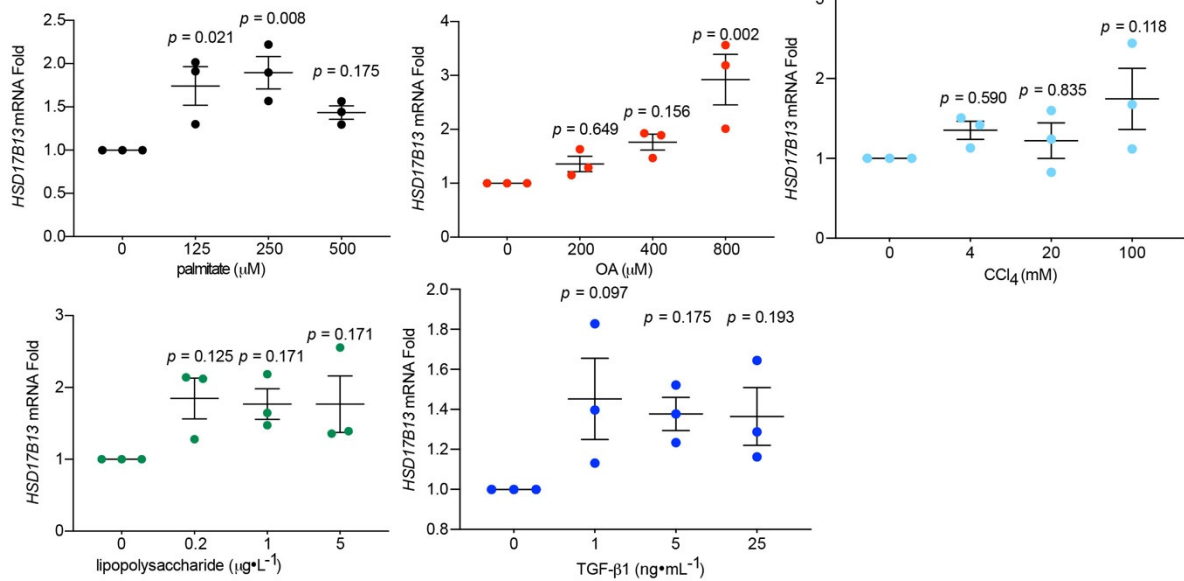

**Supplementary Figure S2.** HSD17B13 is increased in hepatocytes treated by etiological agents. Huh7 (A) and HepG2 (B) cells were treated by palmitate, OA, CCl<sub>4</sub>, lipopolysaccharide, or TGF-β1 for 24 h, respectively. mRNAs were measured by qRT-PCR. Results are expressed as mean ± SEM. OA, oil acid; CCl<sub>4</sub>, carbon tetrachloride; TGF-β1, transforming growth factor-beta 1. .

## SUPPLEMENTARY TABLES

**Supplementary Table S1.** Patient information in DC-Liv00009 and H-Score for immunohistochemical analysis.

| Patients number | Age | Sex    | Organ | Pathology diagnosis | TNM | Grade | stage | HBV     | H-Score |
|-----------------|-----|--------|-------|---------------------|-----|-------|-------|---------|---------|
| A1              | 45  | Male   | Liver | Normal              | -   | -     | -     | No info | 13.08   |
| A2              | 45  | Male   | Liver | Normal              | -   | -     | -     | No info | 19.22   |
| A3              | 23  | Male   | Liver | Normal              | -   | -     | -     | No info | 21.57   |
| A4              | 23  | Male   | Liver | Normal              | -   | -     | -     | No info | 32.89   |
| A5              | 27  | Female | Liver | Normal              | -   | -     | -     | No info | 21.13   |
| A6              | 27  | Female | Liver | Normal              | -   | -     | -     | No info | 13.88   |
| A7              | 42  | Female | Liver | Normal              | -   | -     | -     | No info | 31.01   |
| A8              | 42  | Female | Liver | Normal              | -   | -     | -     | No info | 32.66   |
| A9              | 36  | Male   | Liver | Normal              | -   | -     | -     | No info | 50.9    |
| A10             | 36  | Male   | Liver | Normal              | -   | -     | -     | No info | 51.12   |
| A11             | 21  | Female | Liver | Normal              | -   | -     | -     | No info | 42.33   |
| A12             | 21  | Female | Liver | Normal              | -   | -     | -     | No info | 26.81   |
| A13             | 43  | Male   | Liver | Normal              | -   | -     | -     | No info | 39.3    |
| A14             | 43  | Male   | Liver | Normal              | -   | -     | -     | No info | 39.08   |
| A15             | 50  | Male   | Liver | Normal              | -   | -     | -     | No info | 23.1    |
| A16             | 50  | Male   | Liver | Normal              | -   | -     | -     | No info | 9.57    |
| B1              | 16  | Male   | Liver | Normal              | -   | -     | -     | No info | 72.02   |
| B2              | 16  | Male   | Liver | Normal              | -   | -     | -     | No info | 69.21   |
| B3              | 45  | Male   | Liver | Normal              | -   | -     | -     | No info | 84.96   |
| B4              | 45  | Male   | Liver | Normal              | -   | -     | -     | No info | 83.59   |
| B5              | 38  | Male   | Liver | Normal              | -   | -     | -     | No info | 67.14   |
| B6              | 38  | Male   | Liver | Normal              | -   | -     | -     | No info | 60.78   |
| B7              | 40  | Male   | Liver | Normal              | -   | -     | -     | No info | 61.05   |
| B8              | 40  | Male   | Liver | Normal              | -   | -     | -     | No info | 62.86   |
| B9              | 35  | Male   | Liver | Normal              | -   | -     | -     | No info | 61.18   |
| B10             | 35  | Male   | Liver | Normal              | -   | -     | -     | No info | 63.28   |
| B11             | 35  | Female | Liver | Normal              | -   | -     | -     | No info | 79.21   |
| B12             | 35  | Female | Liver | Normal              | -   | -     | -     | No info | 79.67   |
| B13             | 23  | Male   | Liver | Normal              | -   | -     | -     | No info | 71.05   |
| B14             | 23  | Male   | Liver | Normal              | -   | -     | -     | No info | 67.78   |
| B15             | 18  | Male   | Liver | Normal              | -   | -     | -     | No info | 73.97   |
| B16             | 18  | Male   | Liver | Normal              | -   | -     | -     | No info | 66.18   |
| C1              | 58  | Female | Liver | Inflammation        | -   | -     | -     | (-)     | 73.44   |
| C2              | 58  | Female | Liver | Inflammation        | -   | -     | -     | (-)     | 71.71   |
| C3              | 60  | Male   | Liver | Inflammation        | -   | -     | -     | (+)     | 62.23   |
| C4              | 60  | Male   | Liver | Inflammation        | -   | -     | -     | (+)     | 66.9    |
| C5              | 48  | Female | Liver | Inflammation        | -   | -     | -     | (+)     | 56.06   |
| C6              | 48  | Female | Liver | Inflammation        | -   | -     | -     | (+)     | 56.75   |

|     |    |        |       |                                |   |   |   |     |       |
|-----|----|--------|-------|--------------------------------|---|---|---|-----|-------|
| C7  | 72 | Male   | Liver | Inflammation                   | - | - | - | (-) | 72.05 |
| C8  | 72 | Male   | Liver | Inflammation                   | - | - | - | (-) | 69.14 |
| C9  | 52 | Male   | Liver | Inflammation<br>with steatosis | - | - | - | (-) | 79.11 |
| C10 | 52 | Male   | Liver | Inflammation                   | - | - | - | (-) | 75.32 |
| C11 | 33 | Male   | Liver | Inflammation                   | - | - | - | (+) | 72.17 |
| C12 | 33 | Male   | Liver | Inflammation                   | - | - | - | (+) | 66.45 |
| C13 | 42 | Male   | Liver | Inflammation<br>with steatosis | - | - | - | (-) | 69.53 |
| C14 | 42 | Male   | Liver | Inflammation<br>with steatosis | - | - | - | (-) | 71.19 |
| C15 | 56 | Female | Liver | Inflammation                   | - | - | - | (+) | 56.02 |
| C16 | 56 | Female | Liver | Inflammation                   | - | - | - | (+) | 46.89 |
| D1  | 69 | Male   | Liver | Inflammation                   | - | - | - | (+) | 79.82 |
| D2  | 69 | Male   | Liver | Inflammation                   | - | - | - | (+) | 77.63 |
| D3  | 55 | Male   | Liver | Inflammation<br>with steatosis | - | - | - | (+) | 81.71 |
| D4  | 55 | Male   | Liver | Inflammation                   | - | - | - | (+) | 70.79 |
| D5  | 49 | Male   | Liver | Inflammation                   | - | - | - | (-) | 68.42 |
| D6  | 49 | Male   | Liver | Inflammation<br>with steatosis | - | - | - | (-) | 72.53 |
| D7  | 56 | Male   | Liver | Inflammation                   | - | - | - | (+) | 63.54 |
| D8  | 56 | Male   | Liver | Inflammation                   | - | - | - | (+) | 64.83 |
| D9  | 68 | Male   | Liver | Inflammation                   | - | - | - | (+) | 71.83 |
| D10 | 68 | Male   | Liver | Inflammation                   | - | - | - | (+) | 75.86 |
| D11 | 56 | Female | Liver | Inflammation                   | - | - | - | (+) | 45.93 |
| D12 | 56 | Female | Liver | Inflammation<br>with steatosis | - | - | - | (+) | 51.37 |
| D13 | 48 | Female | Liver | Inflammation                   | - | - | - | (+) | 55.79 |
| D14 | 48 | Female | Liver | Inflammation                   | - | - | - | (+) | 47.67 |
| D15 | 45 | Male   | Liver | Inflammation<br>with steatosis | - | - | - | (+) | 70.02 |
| D16 | 45 | Male   | Liver | Inflammation                   | - | - | - | (+) | 59.14 |
| E1  | 62 | Female | Liver | Inflammation<br>with steatosis | - | - | - | (+) | 85.02 |
| E2  | 62 | Female | Liver | Inflammation<br>with steatosis | - | - | - | (+) | 82.75 |
| E3  | 55 | Male   | Liver | Inflammation                   | - | - | - | (-) | 65.31 |
| E4  | 55 | Male   | Liver | Inflammation                   | - | - | - | (-) | 72.28 |

|     |    |        |       |              |   |   |   |     |       |
|-----|----|--------|-------|--------------|---|---|---|-----|-------|
| E5  | 40 | Male   | Liver | Inflammation | - | - | - | (-) | 67.21 |
| E6  | 40 | Male   | Liver | Inflammation | - | - | - | (-) | 73.31 |
| E7  | 55 | Female | Liver | Inflammation | - | - | - | (-) | 73.32 |
| E8  | 55 | Female | Liver | Inflammation | - | - | - | (-) | 72.14 |
| E9  | 57 | Female | Liver | Inflammation | - | - | - | (-) | 57.94 |
| E10 | 57 | Female | Liver | Inflammation | - | - | - | (-) | 57.5  |
| E11 | 35 | Male   | Liver | Inflammation | - | - | - | (+) | 69.82 |
| E12 | 35 | Male   | Liver | Inflammation | - | - | - | (+) | 69.34 |
| E13 | 67 | Male   | Liver | Inflammation | - | - | - | (-) | 63.43 |
| E14 | 67 | Male   | Liver | Inflammation | - | - | - | (-) | 66.57 |
| E15 | 52 | Male   | Liver | Inflammation | - | - | - | (+) | 80.06 |
| E16 | 52 | Male   | Liver | Inflammation | - | - | - | (+) | 78.77 |
| F1  | 60 | Male   | Liver | Cirrhosis    | - | - | - | (+) | 63.48 |
| F2  | 60 | Male   | Liver | Cirrhosis    | - | - | - | (+) | 74.27 |
| F3  | 52 | Male   | Liver | Cirrhosis    | - | - | - | (+) | 84.72 |
| F4  | 52 | Male   | Liver | Cirrhosis    | - | - | - | (+) | 80    |
| F5  | 43 | Male   | Liver | Cirrhosis    | - | - | - | (+) | 81.54 |
| F6  | 43 | Male   | Liver | Cirrhosis    | - | - | - | (+) | 64.65 |
| F7  | 50 | Female | Liver | Cirrhosis    | - | - | - | (-) | 76.52 |
| F8  | 50 | Female | Liver | Cirrhosis    | - | - | - | (-) | 83.4  |
| F9  | 25 | Male   | Liver | Cirrhosis    | - | - | - | (-) | 77.48 |
| F10 | 25 | Male   | Liver | Cirrhosis    | - | - | - | (-) | 68.27 |
| F11 | 52 | Male   | Liver | Cirrhosis    | - | - | - | (+) | 69.55 |
| F12 | 52 | Male   | Liver | Cirrhosis    | - | - | - | (+) | 49.82 |
| F13 | 40 | Male   | Liver | Cirrhosis    | - | - | - | (-) | 79.99 |
| F14 | 40 | Male   | Liver | Cirrhosis    | - | - | - | (-) | 76.35 |
| F15 | 48 | Male   | Liver | Cirrhosis    | - | - | - | (+) | 55.98 |
| F16 | 48 | Male   | Liver | Cirrhosis    | - | - | - | (+) | 61.1  |
| G1  | 47 | Female | Liver | Cirrhosis    | - | - | - | (-) | 69.26 |
| G2  | 47 | Female | Liver | Cirrhosis    | - | - | - | (-) | 82.29 |
| G3  | 36 | Female | Liver | Cirrhosis    | - | - | - | (-) | 52.17 |
| G4  | 36 | Female | Liver | Cirrhosis    | - | - | - | (-) | 29.27 |
| G5  | 35 | Female | Liver | Cirrhosis    | - | - | - | (+) | 75.47 |
| G6  | 35 | Female | Liver | Cirrhosis    | - | - | - | (+) | 39.65 |
| G7  | 61 | Male   | Liver | Cirrhosis    | - | * | - | (-) | 73.42 |
| G8  | 61 | Male   | Liver | Cirrhosis    | - | * | - | (-) | 60.1  |
| G9  | 46 | Female | Liver | Cirrhosis    | - | - | - | (+) | 69.52 |
| G10 | 46 | Female | Liver | Cirrhosis    | - | - | - | (+) | 73.45 |
| G11 | 67 | Male   | Liver | Cirrhosis    | - | - | - | (+) | 75.33 |
| G12 | 67 | Male   | Liver | Cirrhosis    | - | - | - | (+) | 53.95 |
| G13 | 42 | Male   | Liver | Cirrhosis    | - | - | - | (+) | 82.97 |
| G14 | 42 | Male   | Liver | Cirrhosis    | - | - | - | (+) | 85.75 |
| G15 | 66 | Male   | Liver | Cirrhosis    | - | - | - | (+) | 47.1  |
| G16 | 66 | Male   | Liver | Cirrhosis    | - | - | - | (+) | 61.6  |

|     |    |        |       |           |        |      |      |     |       |
|-----|----|--------|-------|-----------|--------|------|------|-----|-------|
| H1  | 67 | Male   | Liver | Cirrhosis | -      | -    | -    | (+) | 60.1  |
| H2  | 67 | Male   | Liver | Cirrhosis | -      | -    | -    | (+) | 70.01 |
| H3  | 49 | Male   | Liver | Cirrhosis | -      | -    | -    | (-) | 76.26 |
| H4  | 49 | Male   | Liver | Cirrhosis | -      | -    | -    | (-) | 75.76 |
| H5  | 45 | Male   | Liver | Cirrhosis | -      | -    | -    | (-) | 75.94 |
| H6  | 45 | Male   | Liver | Cirrhosis | -      | -    | -    | (-) | 82.77 |
| H7  | 38 | Male   | Liver | Cirrhosis | -      | -    | -    | (+) | 70.93 |
| H8  | 38 | Male   | Liver | Cirrhosis | -      | -    | -    | (+) | 51.49 |
| H9  | 60 | Male   | Liver | Cirrhosis | -      | -    | -    | (+) | 80.56 |
| H10 | 60 | Male   | Liver | Cirrhosis | -      | -    | -    | (+) | 84.78 |
| H11 | 46 | Male   | Liver | Cirrhosis | -      | -    | -    | (-) | 49.97 |
| H12 | 46 | Male   | Liver | Cirrhosis | -      | -    | -    | (-) | 60.85 |
| H13 | 54 | Male   | Liver | Cirrhosis | -      | -    | -    | (-) | 70.74 |
| H14 | 54 | Male   | Liver | Cirrhosis | -      | -    | -    | (-) | 75.67 |
| H15 | 66 | Male   | Liver | Cirrhosis | -      | -    | -    | (-) | 64.53 |
| H16 | 66 | Male   | Liver | Cirrhosis | -      | -    | -    | (-) | 60.79 |
| I1  | 37 | Male   | Liver | Cirrhosis | -      | -    | -    | (+) | 70.71 |
| I2  | 37 | Male   | Liver | Cirrhosis | -      | -    | -    | (+) | 43.43 |
| I3  | 46 | Male   | Liver | Cirrhosis | -      | -    | -    | (-) | 72.02 |
| I4  | 46 | Male   | Liver | Cirrhosis | -      | -    | -    | (-) | 61.91 |
| I5  | 43 | Female | Liver | Cirrhosis | -      | -    | -    | (-) | 76.89 |
| I6  | 43 | Female | Liver | Cirrhosis | -      | -    | -    | (-) | 82.7  |
| I7  | 70 | Male   | Liver | Cirrhosis | -      | -    | -    | (+) | 74.95 |
| I8  | 70 | Male   | Liver | Cirrhosis | -      | -    | -    | (+) | 85.44 |
| I9  | 28 | Male   | Liver | Malignant | T3N0M0 | -    | IIIA | (-) | 73.08 |
| I10 | 28 | Male   | Liver | Malignant | T3N0M0 | 2    | IIIA | (-) | 43.97 |
| I11 | 49 | Male   | Liver | Malignant | T2N0M0 | 2    | II   | (-) | 76.4  |
| I12 | 49 | Male   | Liver | Malignant | T2N0M0 | 2    | II   | (-) | 79.28 |
| I13 | 53 | Male   | Liver | Malignant | T3N0M0 | 2    | IIIA | (+) | 61.79 |
| I14 | 53 | Male   | Liver | Malignant | T3N0M0 | 2    | IIIA | (+) | 41.41 |
| I15 | 55 | Male   | Liver | Malignant | T3N0M0 | 3    | IIIA | (+) | 29.68 |
| I16 | 55 | Male   | Liver | Malignant | T3N0M0 | 3    | IIIA | (+) | 31.37 |
| J1  | 41 | Male   | Liver | Malignant | T2N0M0 | 1--2 | II   | (+) | 53.64 |
| J2  | 41 | Male   | Liver | Malignant | T2N0M0 | 1--2 | II   | (+) | 51.61 |
| J3  | 52 | Male   | Liver | Malignant | T3N1M0 | 2    | IVA  | (+) | 0.32  |
| J4  | 52 | Male   | Liver | Malignant | T3N1M0 | 2    | IVA  | (+) | 0.16  |
| J5  | 60 | Male   | Liver | Malignant | T3N0M0 | 2    | IIIA | (+) | 3.34  |
| J6  | 60 | Male   | Liver | Malignant | T3N0M0 | 2    | IIIA | (+) | 2.73  |
| J7  | 50 | Female | Liver | Malignant | T2N0M0 | 3    | II   | (-) | 6.84  |
| J8  | 50 | Female | Liver | Malignant | T2N0M0 | 3    | II   | (-) | 8.17  |
| J9  | 48 | Male   | Liver | Malignant | T2N0M0 | 2    | II   | (+) | 57.54 |
| J10 | 48 | Male   | Liver | Malignant | T2N0M0 | 2    | II   | (+) | 59.25 |
| J11 | 55 | Male   | Liver | Malignant | T3N0M0 | 3    | IVA  | (+) | 19.05 |
| J12 | 55 | Male   | Liver | Malignant | T3N0M0 | 3    | IVA  | (+) | 6.37  |

|     |    |        |       |           |        |   |      |     |       |
|-----|----|--------|-------|-----------|--------|---|------|-----|-------|
| J13 | 35 | Female | Liver | Malignant | T2N0M0 | 3 | II   | (+) | 7.81  |
| J14 | 35 | Female | Liver | Malignant | T2N0M0 | 3 | II   | (+) | 3.64  |
| J15 | 50 | Male   | Liver | Malignant | T3N0M0 | 3 | IIIA | (+) | 45.63 |
| J16 | 50 | Male   | Liver | Malignant | T3N0M0 | 3 | IIIA | (+) | 35.21 |
| K1  | 46 | Male   | Liver | Malignant | T2N0M0 | 2 | II   | (-) | 34.38 |
| K2  | 46 | Male   | Liver | Malignant | T2N0M0 | 2 | II   | (-) | 6.62  |
| K3  | 66 | Male   | Liver | Malignant | T3N0M0 | 3 | IIIA | (-) | 20.92 |
| K4  | 66 | Male   | Liver | Malignant | T3N0M0 | 3 | IIIA | (-) | 20.33 |
| K5  | 56 | Female | Liver | Malignant | T3N0M0 | * | IIIA | (+) | 20.6  |
| K6  | 56 | Female | Liver | Malignant | T3N0M0 | * | IIIA | (+) | 15.36 |
| K7  | 38 | Male   | Liver | Malignant | T3N0M0 | 3 | IIIA | (+) | 52.82 |
| K8  | 38 | Male   | Liver | Malignant | T3N0M0 | 3 | IIIA | (+) | 47.21 |
| K9  | 54 | Male   | Liver | Malignant | T3N0M0 | 3 | IIIA | (-) | 4.42  |
| K10 | 54 | Male   | Liver | Malignant | T3N0M0 | 3 | IIIA | (-) | 5.12  |
| K11 | 62 | Male   | Liver | Malignant | T3N0M0 | 3 | IIIA | (+) | 67.25 |
| K12 | 62 | Male   | Liver | Malignant | T3N0M0 | 3 | IIIA | (+) | 70.82 |
| K13 | 58 | Male   | Liver | Malignant | T3N0M0 | 3 | IIIA | (+) | 11.11 |
| K14 | 58 | Male   | Liver | Malignant | T3N0M0 | 3 | IIIA | (+) | 8.01  |
| K15 | 62 | Male   | Liver | Malignant | T2N0M0 | 3 | II   | (+) | 16.07 |
| K16 | 62 | Male   | Liver | Malignant | T2N0M0 | 3 | II   | (+) | 5.33  |
| L1  | 67 | Male   | Liver | Malignant | T2N0M0 | 3 | II   | (+) | 12.7  |
| L2  | 67 | Male   | Liver | Malignant | T2N0M0 | 3 | II   | (+) | 14.73 |
| L3  | 62 | Male   | Liver | Malignant | T3N0M0 | 3 | IIIA | (+) | 58.06 |
| L4  | 62 | Male   | Liver | Malignant | T3N0M0 | 3 | IIIA | (+) | 54.38 |
| L5  | 59 | Male   | Liver | Malignant | T3N0M0 | 3 | IIIA | (+) | 79.11 |
| L6  | 59 | Male   | Liver | Malignant | T3N0M0 | 3 | IIIA | (+) | 76.33 |
| L7  | 45 | Male   | Liver | Malignant | T3N0M0 | 2 | IIIA | (+) | 19.5  |
| L8  | 45 | Male   | Liver | Malignant | T3N0M0 | 2 | IIIA | (+) | 21.01 |
| L9  | 32 | Male   | Liver | Malignant | T4N0M0 | 3 | IIIB | (+) | 19.14 |
| L10 | 32 | Male   | Liver | Malignant | T4N0M0 | 3 | IIIB | (+) | 26.26 |
| L11 | 64 | Male   | Liver | Malignant | T3N0M0 | 3 | IVA  | (+) | 3.27  |
| L12 | 64 | Male   | Liver | Malignant | T3N0M0 | 3 | IVA  | (+) | 2.83  |
| L13 | 52 | Male   | Liver | Malignant | T3N0M0 | 3 | IIIA | (+) | 31.88 |
| L14 | 52 | Male   | Liver | Malignant | T3N0M0 | 3 | IIIA | (+) | 27.22 |
| L15 | 48 | Female | Liver | Malignant | T2N0M0 | 2 | II   | (+) | 1.21  |
| L16 | 48 | Female | Liver | Malignant | T2N0M0 | 2 | II   | (+) | 0.6   |

---



**Supplementary Table S2 .** Antibodies for Western blot and immunohistochemical staining analyses.

| <b>Antibody</b> | <b>Source</b>             | <b>Cat No.</b> |
|-----------------|---------------------------|----------------|
| COL1A1          | Santa Cruz                | sc-293182      |
| TIMP1           | Santa Cruz                | sc-365905      |
| $\beta$ -Actin  | Cell Signaling Technology | 3700S          |
| SCD1            | Cell Signaling Technology | 2438S          |
| ACC1            | HUABIO                    | ET1609-77      |
| PLIN2           | HUABIO                    | ET1704-17      |
| HSD17B13        | NOVUS                     | NBP3-04837     |
| IBA-1           | Servicebio                | GB12105        |
| CD31            | Servicebio                | GB113151       |
| CD11b           | Servicebio                | GB11058        |
| CD36            | Abcam                     | ab133625       |
| HCV core        | Abcam                     | ab2740         |
| HSD17B13        | Abcam                     | ab122036       |
| $\alpha$ -SMA   | Abcam                     | ab7817         |
| Albumin         | Abcam                     | ab106582       |
| 6X-his tag      | Invitrogen                | MA121315       |
| HSD17B13        | Invitrogen                | PA5-56063      |
| HSD17B13        | Invitrogen                | PA5-25633      |
| HSD17B13        | Invitrogen                | PA5-109834     |

**Supplementary Table S3.** Primers for plasmid construction.

| <b>Gene</b>    | <b>Primer Sequence (5'-3')</b> |                                                               |
|----------------|--------------------------------|---------------------------------------------------------------|
| HSD17B13       | Forward                        | TACCGAGCTCGGATCCATGAACATCATCCTAGAAATCC                        |
|                | Reverse                        | AACGGGGCCCTCTAGACTCGAGTCATTTTCATTTTGATTTTGT                   |
| HSD17B13-His   | Reverse                        | AACGGGGCCCTCTAGACTCGAG-TCAATGGTGATGGTGATGATGTTTCATTTTGATTTTGT |
| HSD17B13 iso-D | Forward                        | CCTGAACGCGCCTCAGCGATTTTAAATGGTATGCAG                          |
|                | Reverse                        | TGAGGCGCGTTCAGGAAGAACTTCTGTAGTCTCAG                           |
| PLIN2          | Forward                        | CGGGGTACCATGGCATCCGTTGCAGTTGATCC                              |
|                | Reverse                        | CCCTCGAGTCAATGAGTTTATGCTCAGAT                                 |

Supplementary Table S4. Primers for qRT-PCR.

| Gene                                 |         | Sequence (5'-3')                    |
|--------------------------------------|---------|-------------------------------------|
| Human <i>GAPDH</i>                   | Forward | CGGAGTCAACGGATTTGGTCGTAT            |
|                                      | Reverse | AGCCTTCTCCATGGTGGTGAAGAC            |
| Human <i>HSD17B13</i>                | Forward | ATCACAAAAGCACTTCTTCCATC             |
|                                      | Reverse | AGACCTCTGTGAAAGCCAAC                |
| Human <i>HSD17B4</i>                 | Forward | TTGGGCCGAGCCTATGC                   |
|                                      | Reverse | CCCCTCCCAAATCATTACACA               |
| Human <i>HSD17B7</i>                 | Forward | TTGACACCATATAATGGAACAGAAG           |
|                                      | Reverse | TGATCAGAGGATTGAGAGATTGAG            |
| Human <i>HSD17B8</i>                 | Forward | ACATCAGTAGCATCGTAGG                 |
|                                      | Reverse | GGAGGACAGAGTTACAGC                  |
| Human <i>HSD17B10</i>                | Forward | GGCATGACACTGCCCATTG                 |
|                                      | Reverse | GGTCACCCAGTCGGCTAGG                 |
| Human <i>HSD17B11</i>                | Forward | TGCAATGACGAAGAATAACC                |
|                                      | Reverse | TTGTAAGGCAGCCAGTTC                  |
| Human <i>HSD17B12</i>                | Forward | GCCAACTTTGGATAAGCCCTCTC             |
|                                      | Reverse | AGGCAGGTTTGAGATTATCGAGC             |
| Human $\alpha$ -SMA                  | Forward | GAGTTACGAGTTGCCTGATGG               |
|                                      | Reverse | GATGCTGTTGTAGGTGGTTTCA              |
| Human <i>COL1A1</i>                  | Forward | TCTGGCGCTCCCATGGCTCT                |
|                                      | Reverse | GCCCTGCGGCACAAGGGATT                |
| Human <i>TIMP1</i>                   | Forward | TGTTGTTGCTGTGGCTGATAGC              |
|                                      | Reverse | TCTGGTGTCCCCACGAACTT                |
| HCV                                  | Forward | CGGGAGAGCCATAGTGGTCTGCG             |
|                                      | Reverse | CTCGCAAGCACCCCTATCAGGCAGTA          |
|                                      | Probe   | FAM-5'-AGGCCTTGTGGTACTGCCT-3'-TAMRA |
| <i>GAPDH</i> <sup>a</sup>            | Forward | CGGAGTCAACGGATTTGGTCGTAT            |
|                                      | Reverse | AGCCTTCTCCATGGTGGTGAAGAC            |
|                                      | Probe   | FAM-5'-CCGTCAAGGCTGAGAACGG-3'-TAMRA |
| Human <i>IL-6</i>                    | Forward | GAGTAGTGAGGAACAAGCCAGA              |
|                                      | Reverse | AAGCTGCGCAGAATGAGATGA               |
| Human <i>CXCL3</i>                   | Forward | CCAAACCGAAGTCATAGCCAC               |
|                                      | Reverse | TGCTCCCCTTGTTTCAGTATCT              |
| Human <i>TGF-<math>\beta</math>1</i> | Forward | CCGACTACTACGCCAAGGAG                |
|                                      | Reverse | TGAGGTATCGCCAGGAATTG                |
| Mouse <i>Hsd17b13</i>                | Forward | TTGCAAAGCAGAAAAGCAGA                |
|                                      | Reverse | GGCGTTGTTTACCACGATCT                |

<sup>a</sup>. internal reference for HCV quantification.
